# Supplementary material
Source: PubMed Central journal article supplement (PMC3904357)

## Supplementary Figure 1

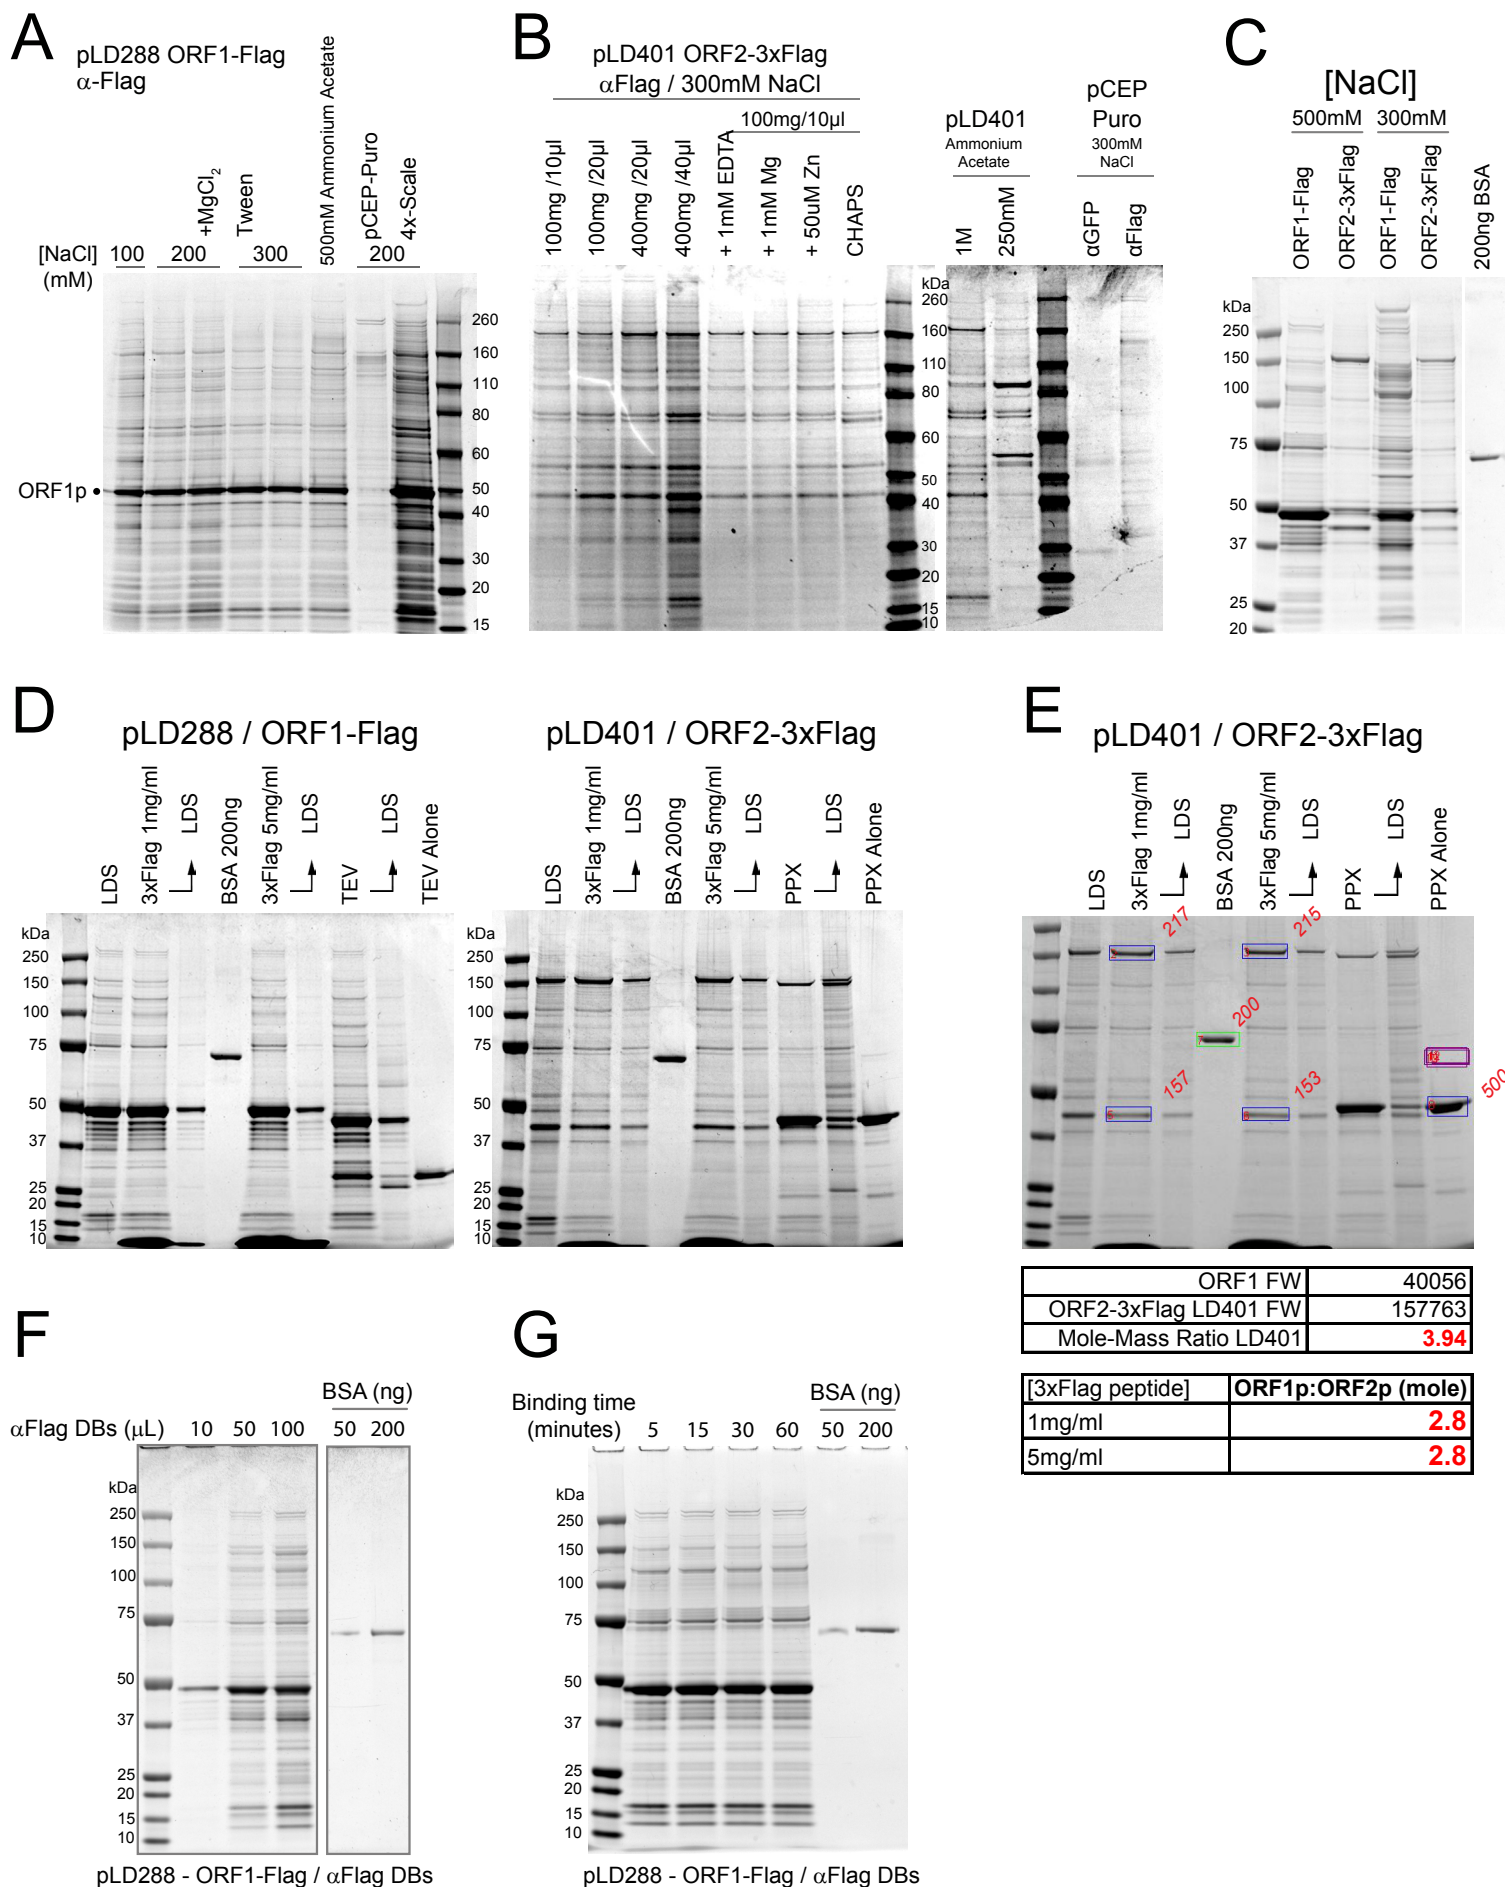

## Supplemental Figure 2

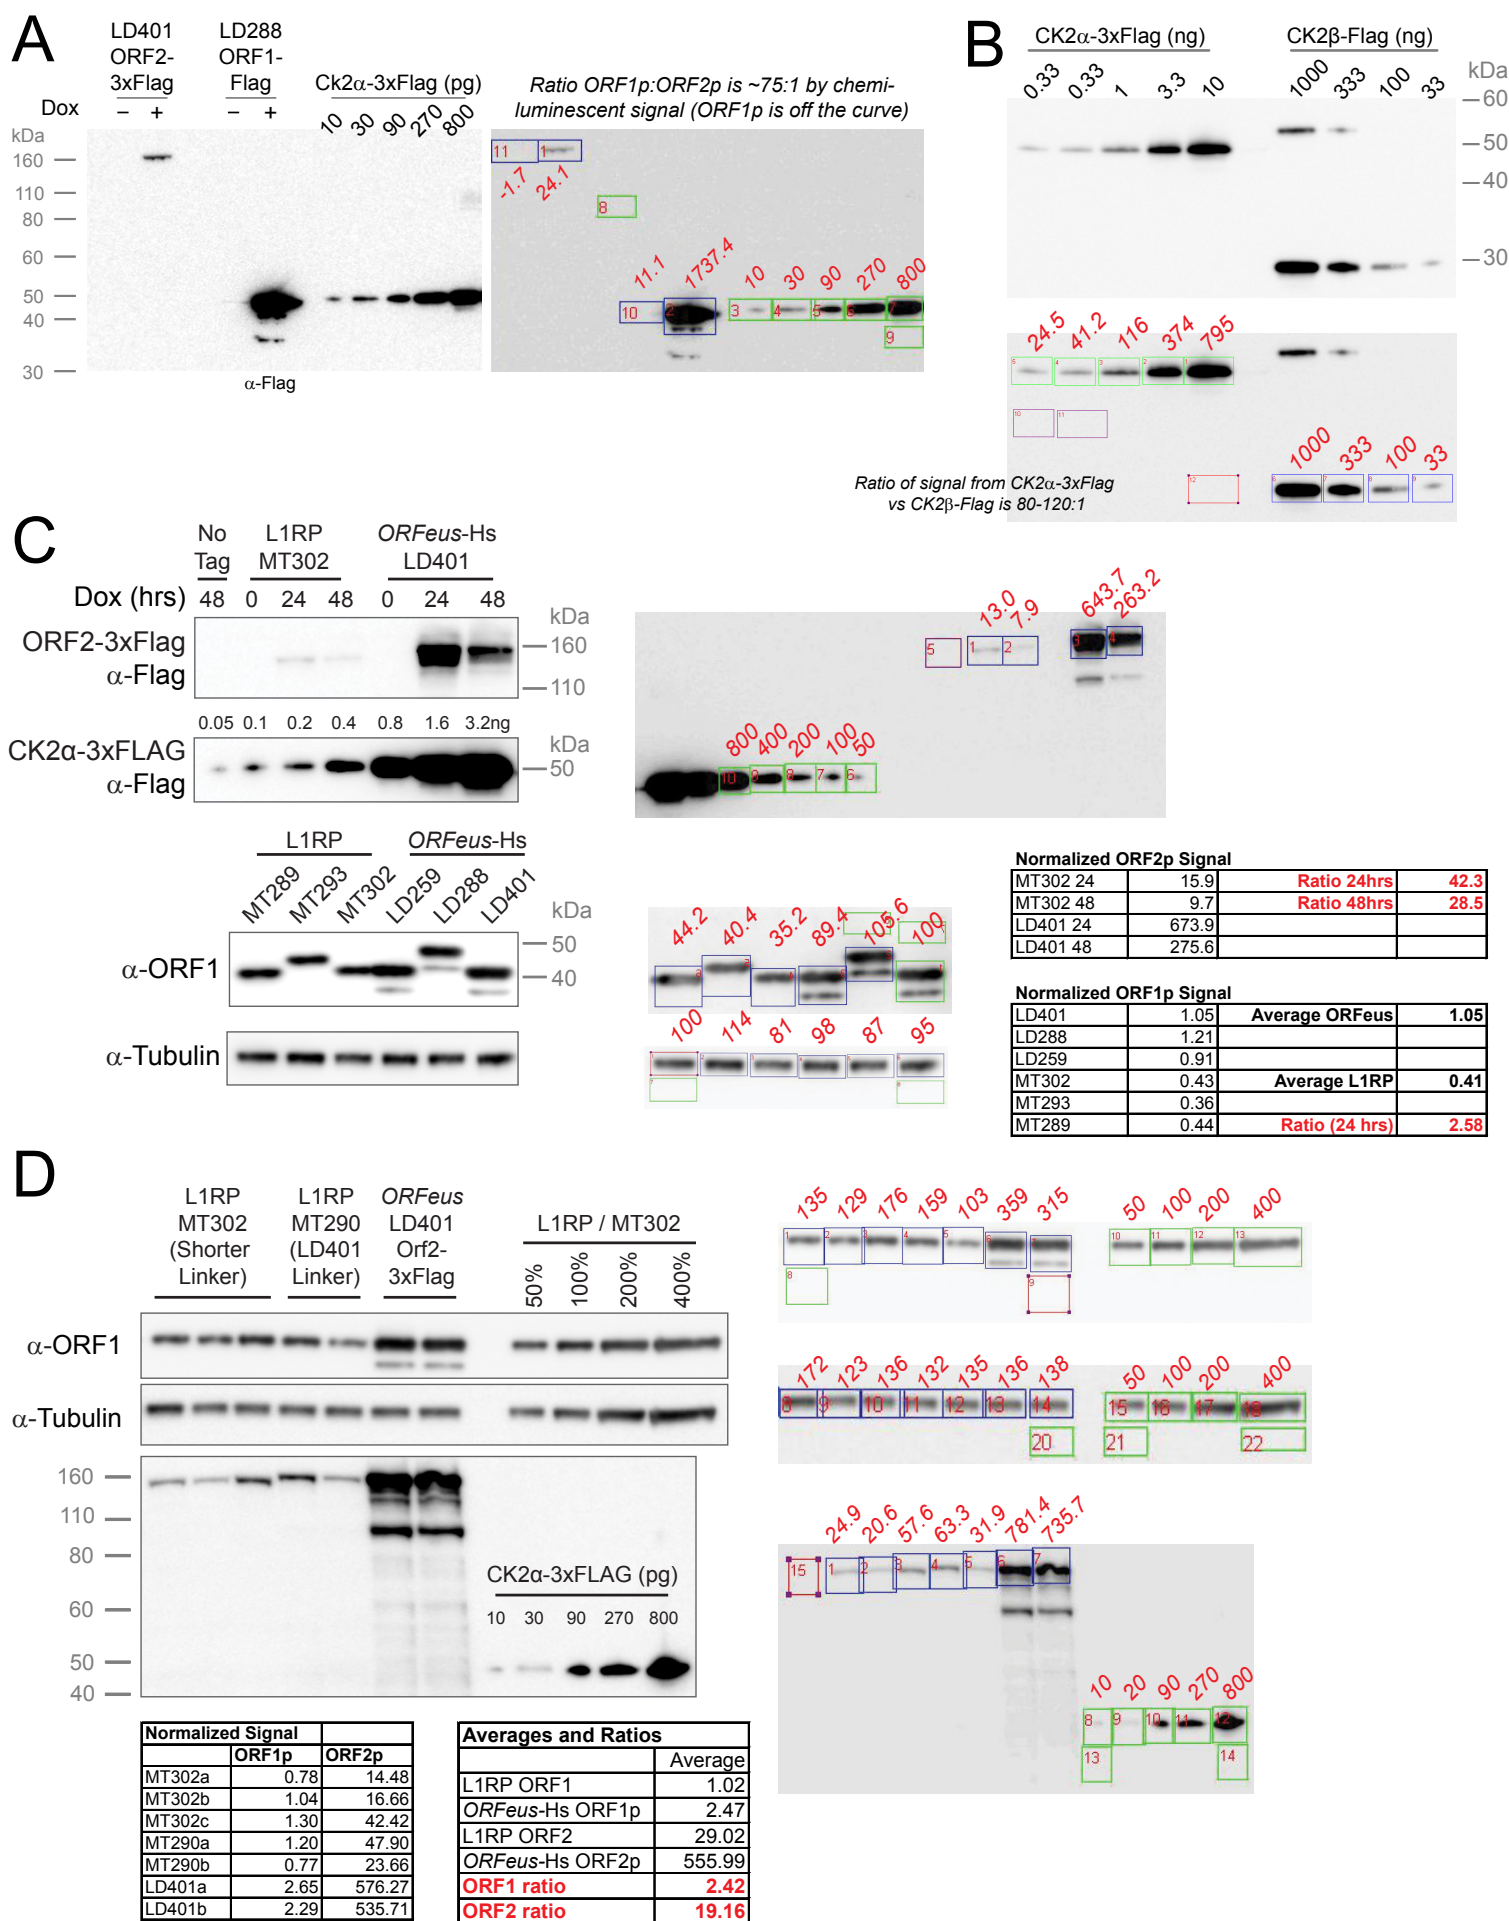

## Supplemental Figure 3

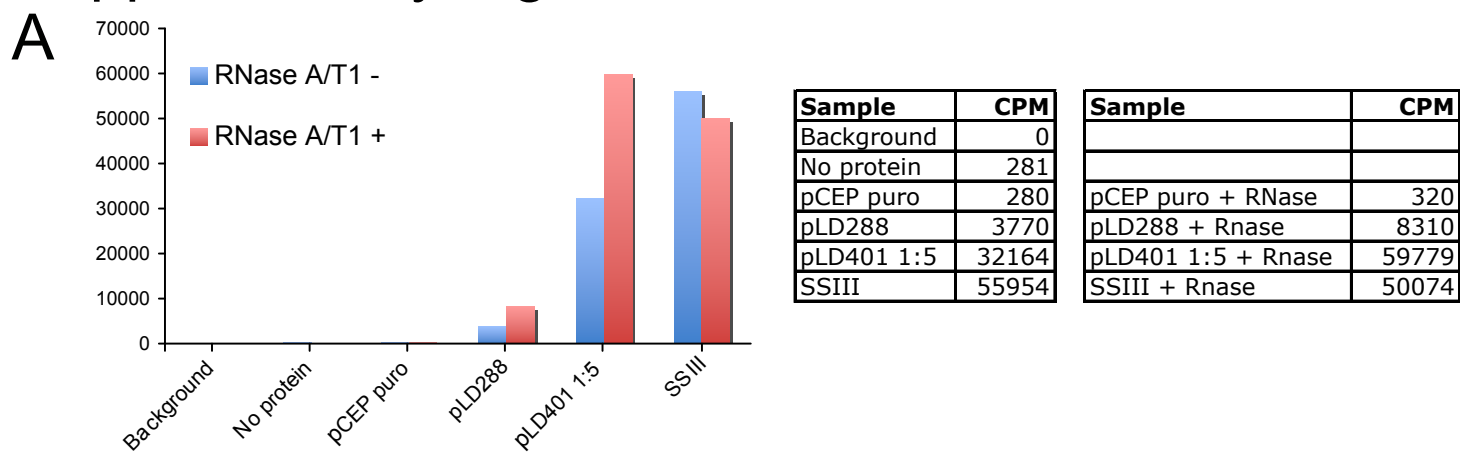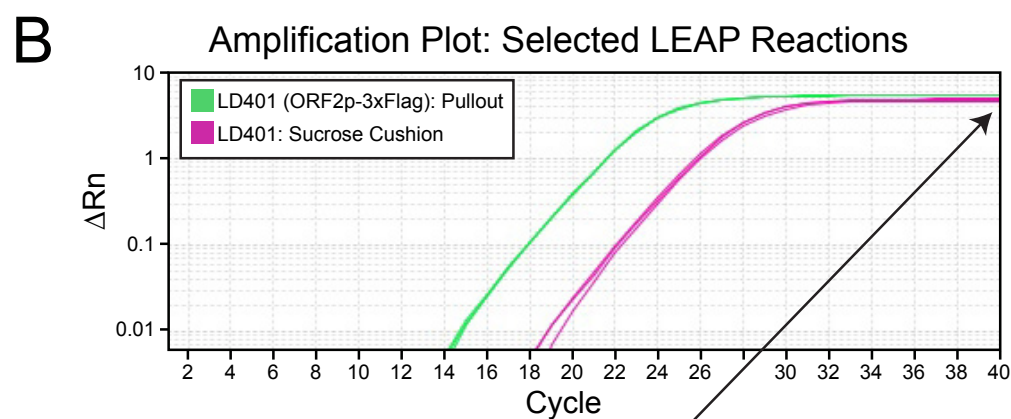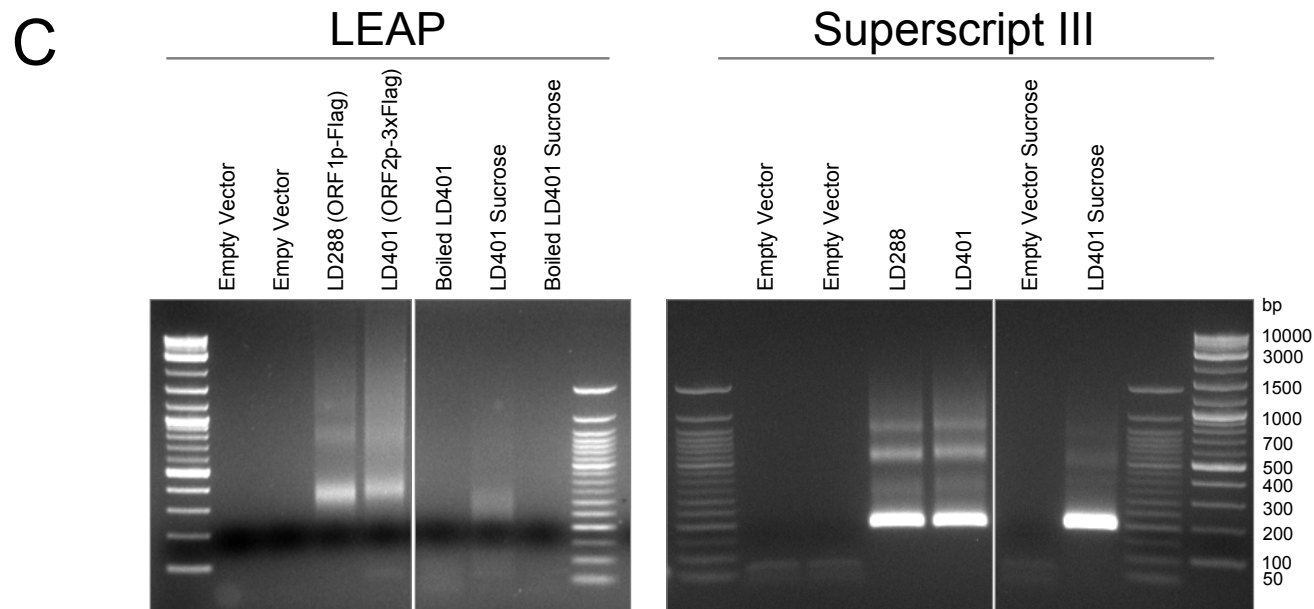

**D**

Total Sample RNA (ng/μl, Trizol extraction --> Nanodrop)

| Sample                | Read 1 | Read 2 | Read 3 | Average (ng/μl) | Std Dev      |
|-----------------------|--------|--------|--------|-----------------|--------------|
| LD401 Pullout         | 1.9    | 1.5    | 2.2    | <b>1.87</b>     | <b>0.35</b>  |
| LD401 Sucrose Cushion | 1234.8 | 1211.4 | 1236.3 | <b>1227.50</b>  | <b>13.96</b> |

658 fold difference

Comparing ORF2p Pullout to Sucrose Cushion:

|                                          |                |                       |
|------------------------------------------|----------------|-----------------------|
| Relative LEAP signal                     | 19.92          | fold (pullout higher) |
| Relative L1 RNA via SuperScript III      | 0.29           | fold (cushion higher) |
| L1 RNA enriched vs total RNA by          | <b>194.0</b>   | fold                  |
| LEAP signal per ng total RNA enriched by | <b>13099.2</b> | fold                  |

## Supplemental Figure 4

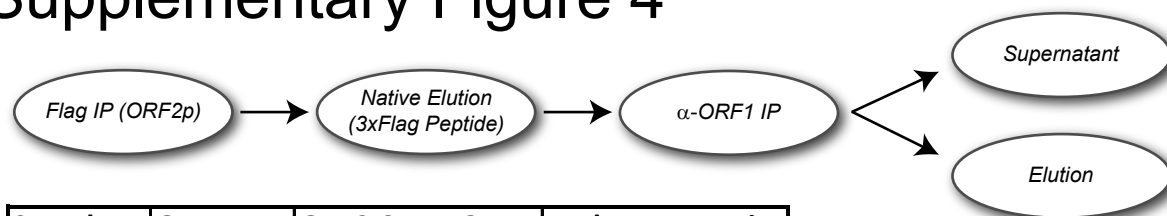

| Sample | ORF1 FW   | ORF2-3xFLAG FW | Mole-Mass Ratio |
|--------|-----------|----------------|-----------------|
| LD401  | 40,056.00 | 157,762.90     | <b>3.94</b>     |
| MT302  | 40,056.00 | 153,156.80     | <b>3.82</b>     |

| Source Cells     | Sample | Background        | Date   | Method    | Average ORF2 (ng) | Average ORF1 (ng) | ORF1:ORF2 (mole) |
|------------------|--------|-------------------|--------|-----------|-------------------|-------------------|------------------|
| 1/6/2012, 9/8/12 | LD401  | <i>ORFeus</i> -Hs | 15-Mar | Sypro     | 52.95             | 73.57             | <b>5.5</b>       |
| 3/28/2013        | LD401  | <i>ORFeus</i> -Hs | 12-Apr | Sypro     | 100.37            | 154.30            | <b>6.1</b>       |
| 3/28/2013        | LD401  | <i>ORFeus</i> -Hs | 12-Apr | Coomassie | 90.42             | 174.89            | <b>7.6</b>       |
| 8/27/2012        | MT302  | L1RP              | 20-Mar | Sypro     | 3.31              | 4.91              | <b>5.7</b>       |
| 8/27/2012        | MT302  | L1RP              | 1-Apr  | Sypro     | 2.41              | 5.42              | <b>8.6</b>       |

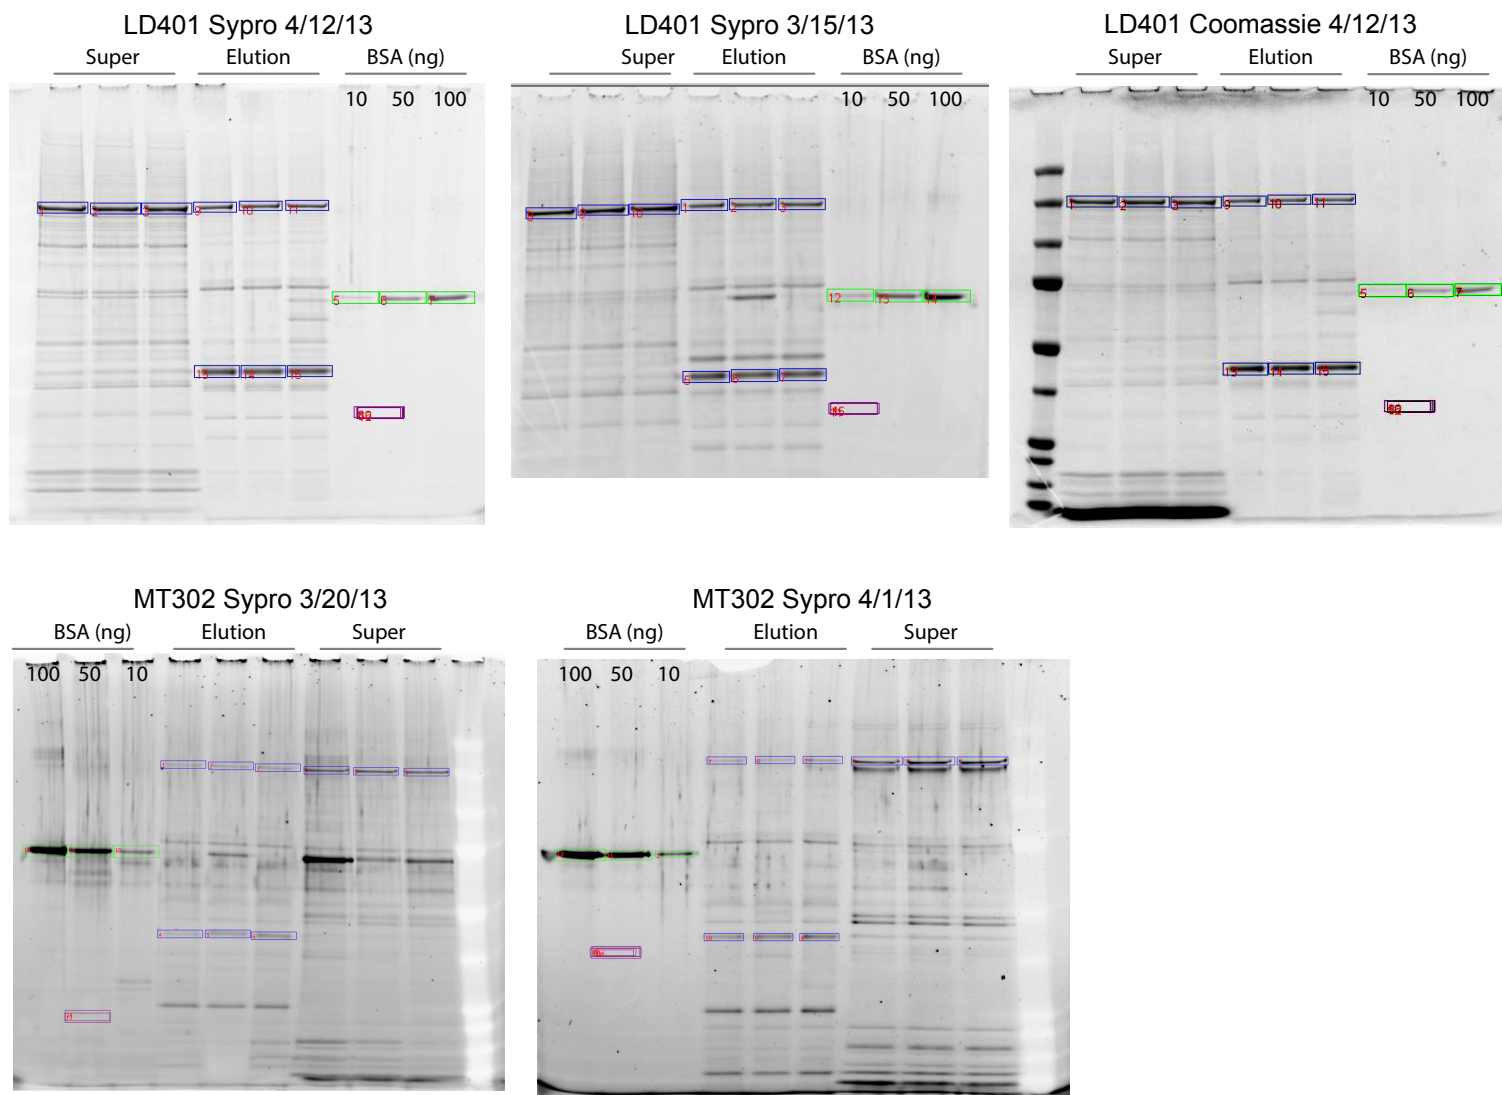

## Supplementary Figure 5

*HeLa. pLD401: ORF2-3xFlag, ORFeus-Hs, TRE promoter. 40x Epi.*

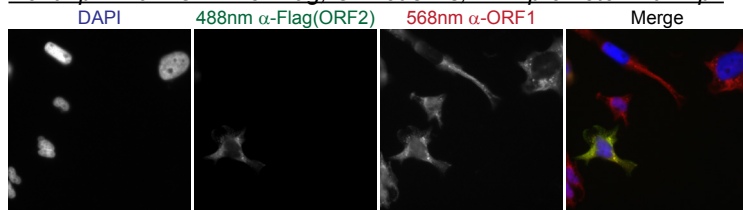

*HeLa. pLD563: ORF2-3xFlag, ORFeus-Hs, CMV promoter. 40x Epi.*

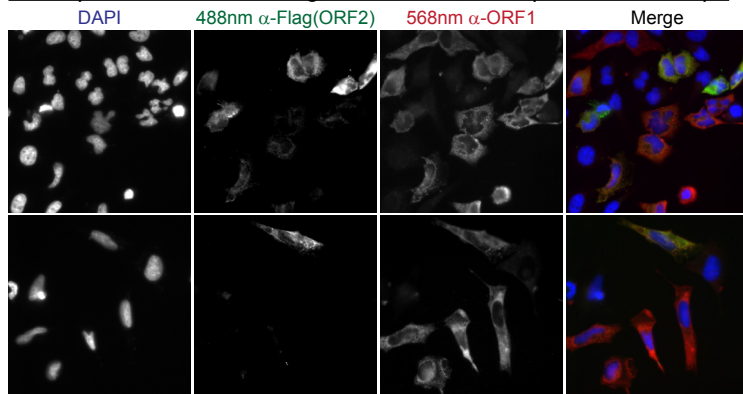

*HeLa. pMT302: ORF2-3xFlag, L1RP, TRE promoter. 40x Epi.*

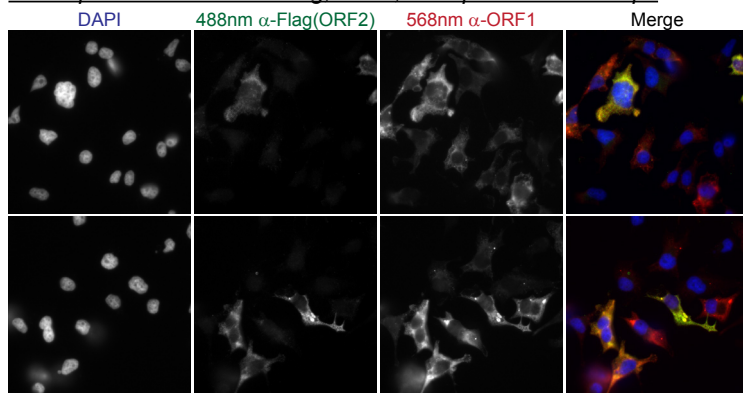

*HeLa. pLD564: ORF2-3xFlag, L1RP, CMV promoter. 40x Epi.*

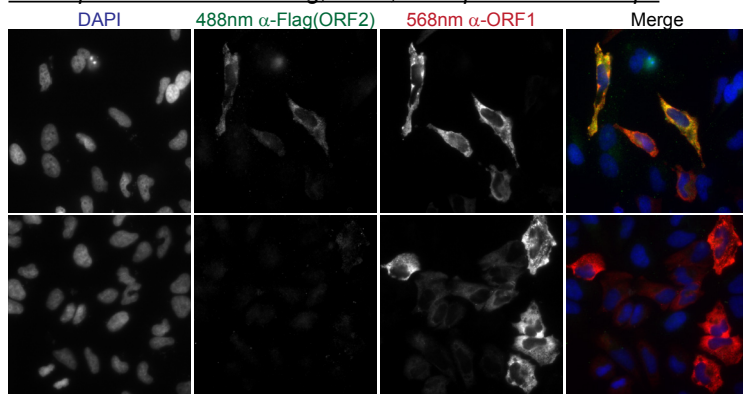

*HeLa. pLD561. ORF2-3xFlag alone (no ORF1), ORFeus-Hs, pTRE.*

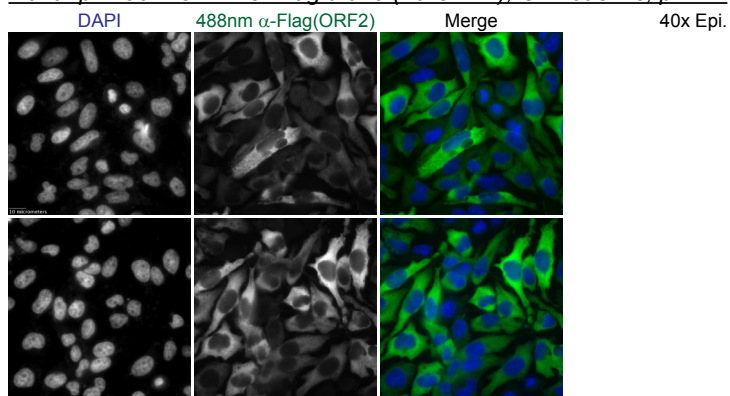

Please note - pLD401, pMT302, pLD561, and empty pCEP-Puro are puromycin-selected. All other panels are transient transfections.

*HeLa. pLD259: Untagged ORFeus-HS, TRE promoter. 63x Epi.*

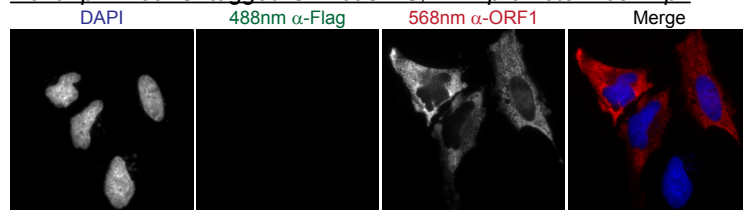

*HeLa. Empty pCEP-Puro-Tet, TRE promoter. 63x Epi.*

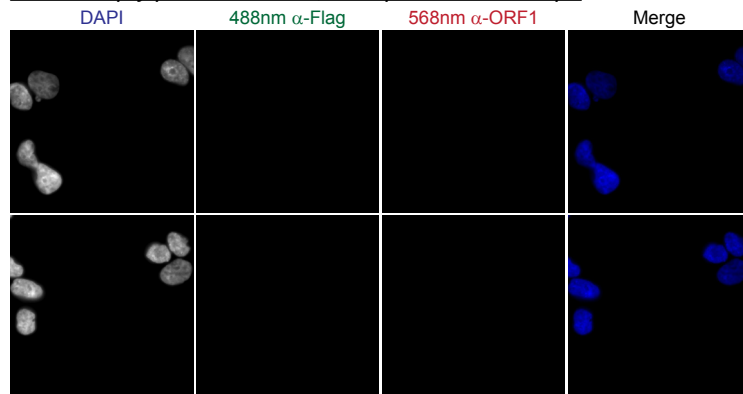

*HeLa. pLD288: ORF1-Flag, ORFeus-HS, TRE promoter. 63x Epi.*

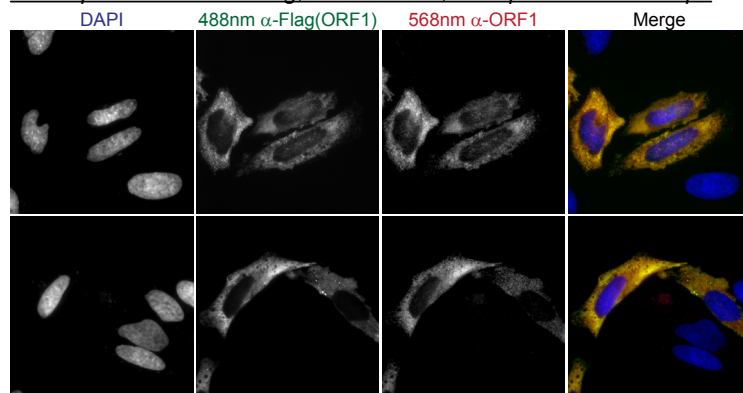

*HEK-293T<sub>LD</sub> Cells. Empty pCEP-Puro-Tet, TRE promoter. 63x Epi.*

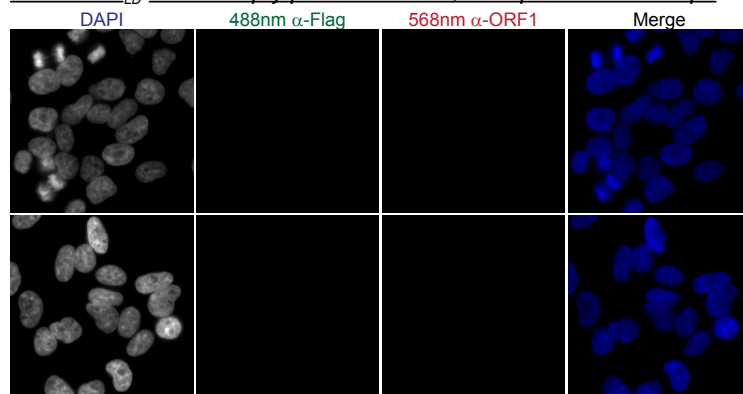

*HEK-293T<sub>LD</sub>. pLD288: ORF1-Flag, ORFeus-HS, pTRE. 63x Epi.*

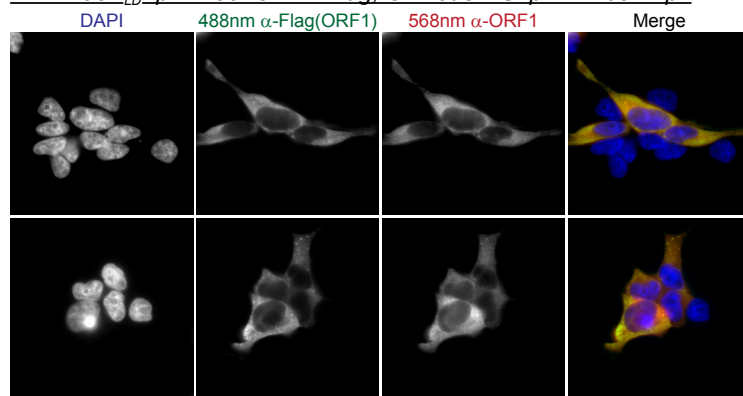

## Supplementary Figure 6

## ORF1p Pullout I-DIRT

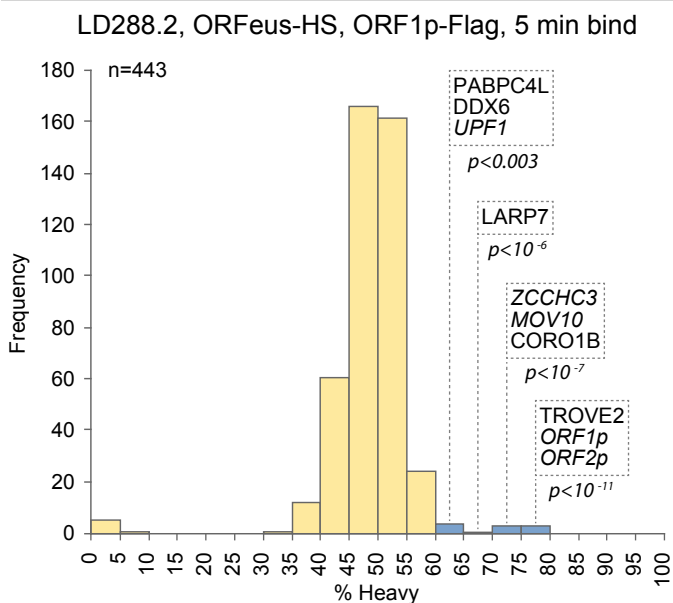

## ORF2p Pullout I-DIRT

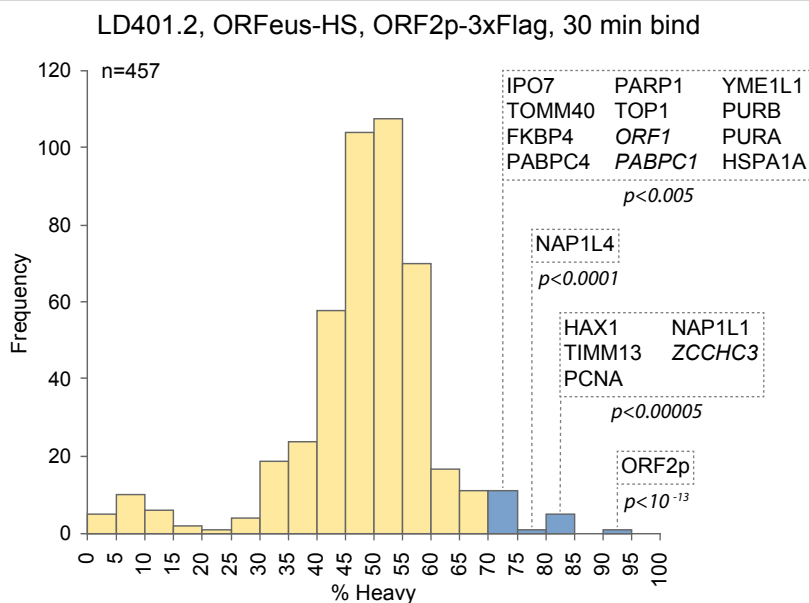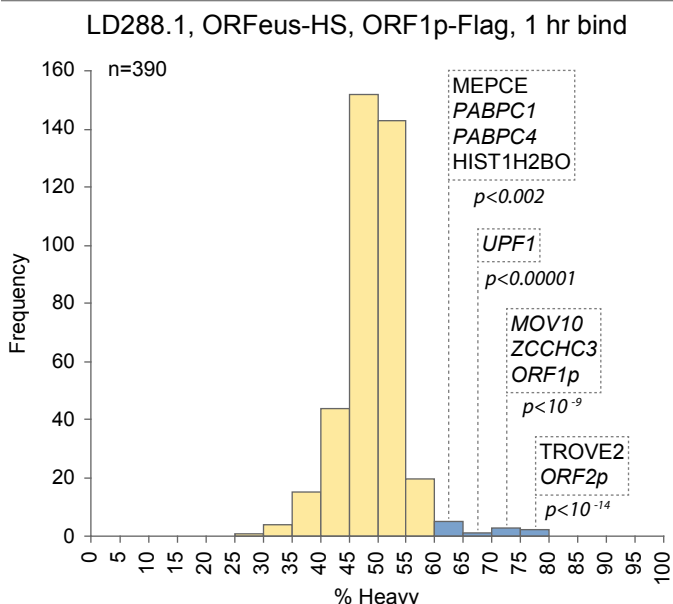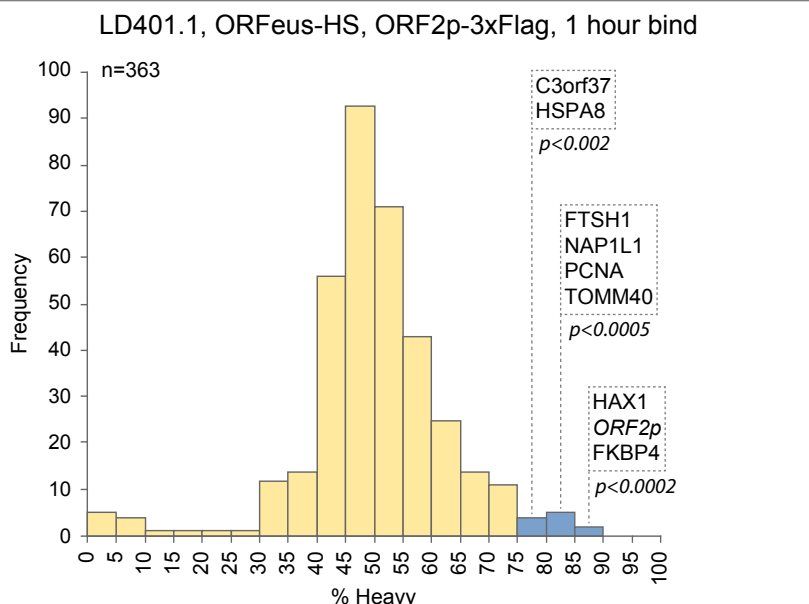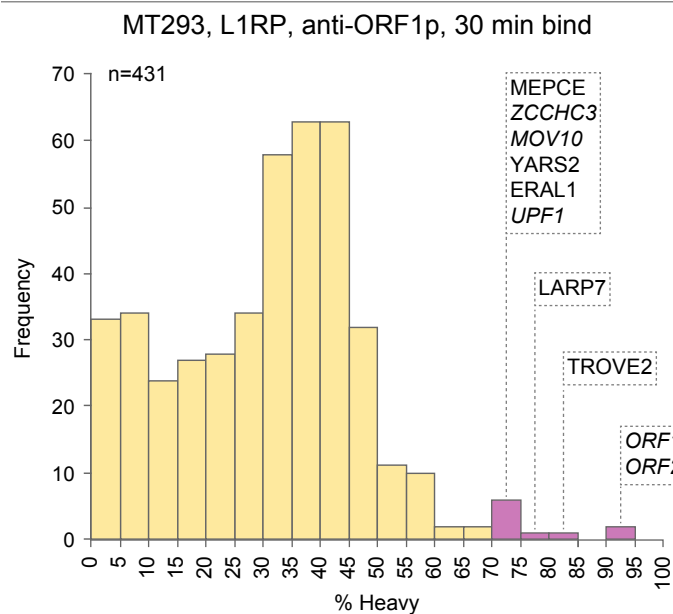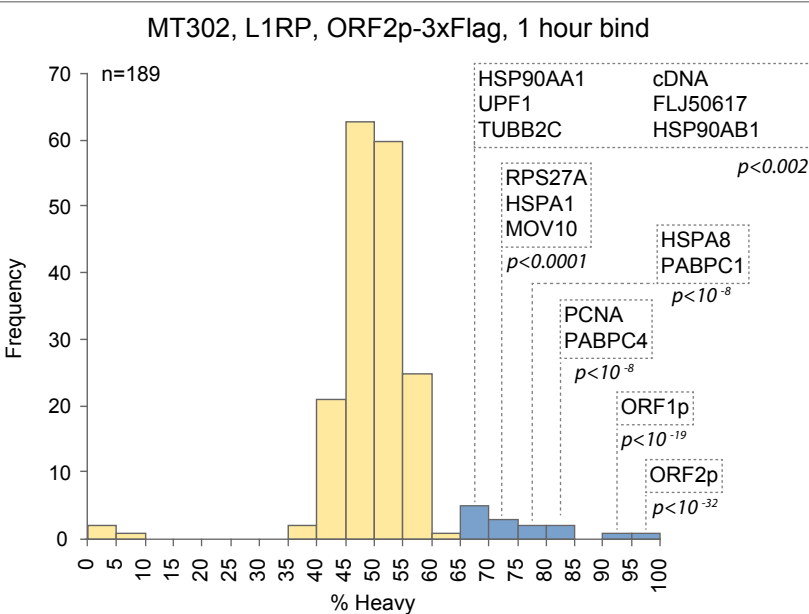

Significant recovered protein      Non-significant recovered protein      MT293, above the arbitrary 71% cutoff †

## Supplementary Figure 7

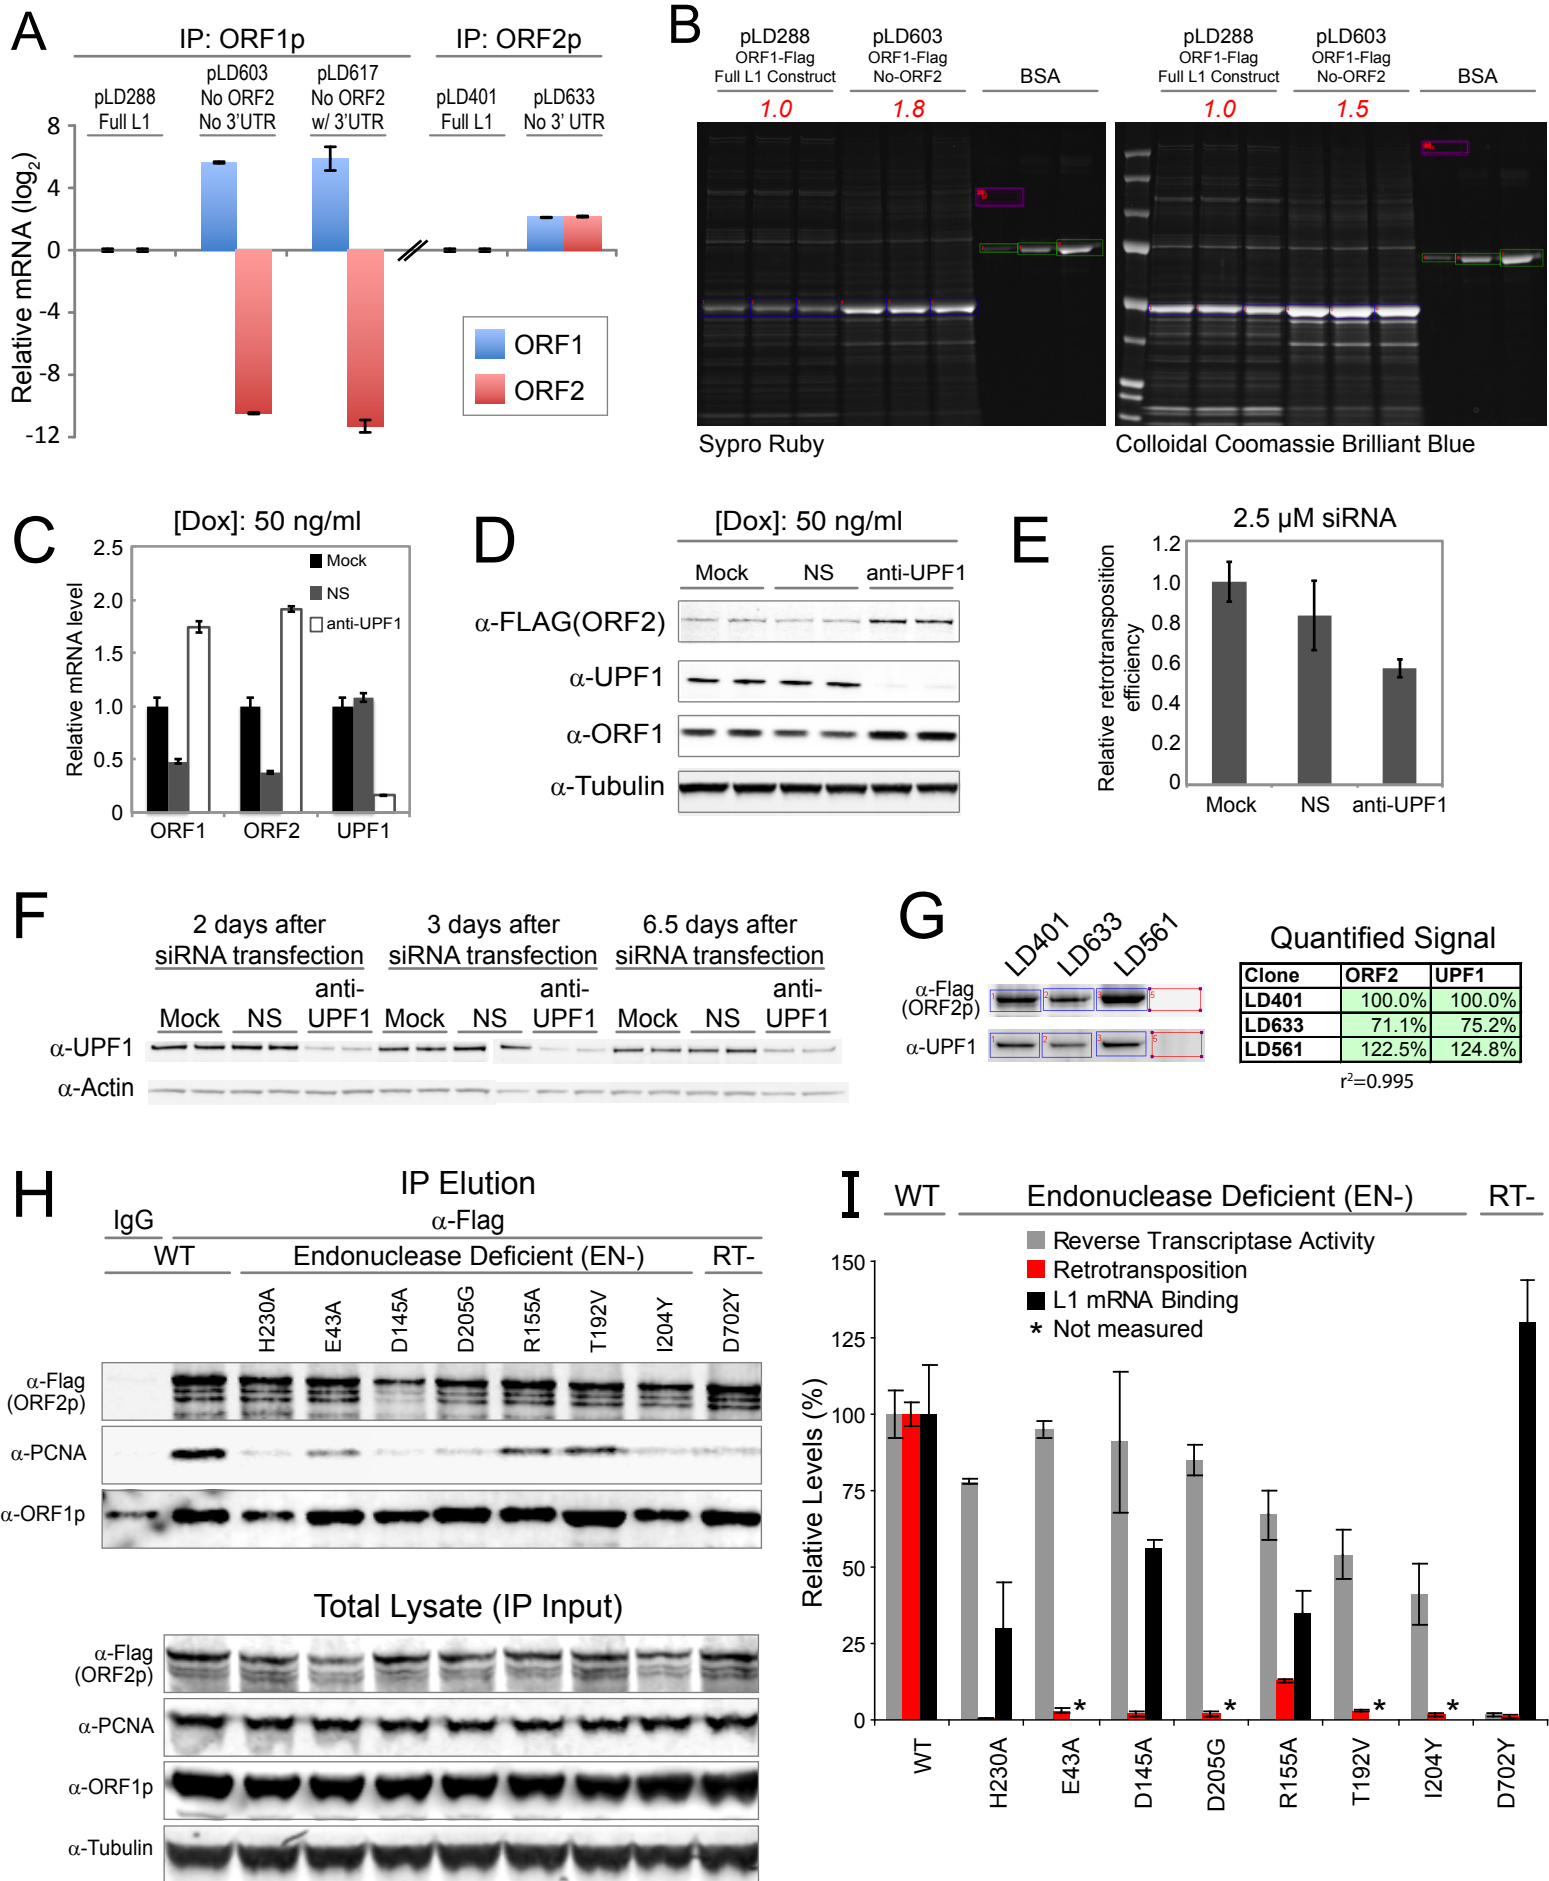

Supplement: NIHMS545067-supplement-02.pdf [file NIHMS545067-supplement-02.pdf]
